# Supplementary material for: The genome of Streptococcus pneumoniae is organized in topology-reacting gene clusters
Source: PubMed Central journal article supplement — Nucleic Acids Res. 2010 Feb 21;38(11):3570–81. doi: 10.1093/nar/gkq106 (PMC2887967; doi:10.1093/nar/gkq106), 2010-02-21
Supplement: gkq106_1.pdf [file gkq106_1.pdf]

**Supplementary Table 1.** Transcriptional response to relaxation by novobiocin, genes listed by

chromosomal location

| R6<br>locus | Protein <sup>a</sup>                                  | Cluster | Relative fold variation at <sup>b</sup> |       |      |          |       |       |
|-------------|-------------------------------------------------------|---------|-----------------------------------------|-------|------|----------|-------|-------|
|             |                                                       |         | 0,5 x MIC                               |       |      | 40 x MIC |       |       |
|             |                                                       |         | 5'                                      | 15'   | 30'  | 5'       | 15'   | 30'   |
| spr0002     | DNA polymerase III beta-subunit                       | 1       | 2.05                                    | 2.19  | 2.01 | 2.32     | 3.02  | 3.00  |
| spr0003     | Hypothetical protein                                  | 1       | 2.37                                    | 2.85  |      | 2.38     | 3.53  | 3.72  |
| spr0004     | Conserved hypothetical protein                        | 1       |                                         | 2.02  |      |          | 2.83  | 3.04  |
| spr0005     | Peptidyl-tRNA hydrolase                               | 1       | 2.40                                    | 2.80  |      | 2.38     | 5.36  | 6.06  |
| spr0006     | Transcription-repair coupling factor                  | 1       |                                         |       |      |          | 2.33  | 2.30  |
| spr0007     | Conserved hypothetical protein                        | 1       | 2.06                                    | 2.28  |      | 2.01     | 4.07  | 4.17  |
| spr0008     | Hypothetical protein                                  | 1       |                                         |       |      |          | 3.13  | 3.35  |
| spr0009     | Conserved hypothetical protein                        | 1       |                                         |       |      | 2.03     | 3.34  | 3.46  |
| spr0010     | Conserved hypothetical protein                        | 1       | 2.66                                    | 2.81  |      | 2.88     | 6.53  | 6.96  |
| spr0011     | Hypoxanthine guanine P-ribosyltransferase             | 1       | 2.45                                    | 2.73  | 2.06 | 2.41     | 5.52  | 5.69  |
| spr0012     | Cell-division protein /general stress protein         | 1       | 2.16                                    | 2.39  |      |          | 3.12  | 3.26  |
| spr0013     | Competence-specific transcription modulator           | 1       | 2.31                                    | 2.77  | 2.13 |          | 2.00  |       |
| spr0017     | Degenerate transposase (orf2)                         | 1       |                                         |       |      |          | 2.67  | 2.92  |
| spr0018     | Degenerate transposase (orf2)                         | 1       |                                         | 2.04  |      |          | 3.33  | 4.01  |
| spr0019     | Degenerate transposase (orf1)                         | 1       |                                         | 2.04  |      |          | 3.27  | 3.92  |
| spr0028     | P-ribosylpyrophosphate synthase                       | 2       | -3.13                                   | -2.76 |      |          |       |       |
| spr0029     | Degenerate transposase (orf1)                         | 2       | -2.95                                   | -2.87 |      | -3.43    | -2.83 |       |
| spr0030     | Hypothetical protein                                  | 2       | -3.01                                   | -4.05 |      | -3.09    | -5.27 | -4.08 |
| spr0031     | Hypothetical protein                                  | 2       | -2.99                                   | -4.23 |      | -2.45    | -3.71 | -2.29 |
| spr0032     | DNA polymerase I                                      | 2       | -5.27                                   | -5.61 |      |          |       |       |
| spr0033     | Conserved hypothetical protein                        | 2       | -5.35                                   | -4.64 |      |          |       |       |
| spr0034     | Conserved hypothetical protein                        | 2       | -3.37                                   | -2.21 |      |          |       |       |
| spr0035     | Aspartate aminotransferase                            | 2       | -3.08                                   | -2.72 |      |          |       |       |
| spr0036     | Conserved hypothetical protein                        | 2       | -2.74                                   | -2.56 |      |          |       |       |
| spr0037     | Involved in fatty acid/phospholipid synthesis         | 2       | -2.40                                   | -2.54 |      |          |       |       |
| spr0038     | Acyl carrier protein                                  | 2       | -2.13                                   | -2.37 |      |          |       |       |
| spr0039     | Degenerate transposase (orf2)                         | 2       |                                         |       |      |          | 2.30  | 2.17  |
| spr0040     | Amphipathic pore-forming peptide precursor            | 2       | -2.22                                   | -2.06 |      |          |       |       |
| spr0041     | Transposase (orf2)                                    | 2       | -3.68                                   | -3.92 |      |          |       |       |
| spr0044     | Transport protein ComB                                | 2       | -2.25                                   | -2.04 |      |          |       |       |
| spr0045     | P-ribosylaminoimidazole-succinocarboxamide synthetase |         |                                         |       | 6.41 |          |       |       |
| spr0046     | P-ribosylformylglycinamide synthetase                 |         |                                         |       | 7.62 |          |       | 2.52  |
| spr0047     | Amido-P-ribosyl transferase                           |         |                                         |       | 3.88 |          |       | 2.14  |
| spr0048     | P-ribosylaminoimidazole synthetase                    |         |                                         |       | 3.15 |          |       | 2.00  |
| spr0049     | 5-P-ribosylglycinamide transformylase 1               |         |                                         |       | 4.75 |          |       | 2.28  |
| spr0050     | Teicoplanin resistance protein                        |         |                                         |       | 5.90 |          | 3.06  | 2.89  |
| spr0051     | P-ribosylaminoimidazolecarboxamide formyltransferase  |         |                                         |       | 4.80 |          | 2.09  | 2.14  |
| spr0052     | P-ribosylglycinamide synthetase                       |         |                                         |       | 5.24 | 3.86     | 3.98  | 3.33  |
| spr0053     | P-ribosylaminoimidazole carboxylase                   |         |                                         |       | 2.71 | 3.09     | 3.05  | 2.82  |
| spr0054     | P-ribosyl glucinamide formyltransferase               |         |                                         |       | 3.11 | 3.07     | 3.20  | 2.84  |
| spr0067     | Conserved hypothetical protein                        |         |                                         |       |      | -2.09    | -2.68 | -2.64 |
| spr0068     | Conserved hypothetical protein                        |         | -2.71                                   | -2.07 |      |          | -2.73 | -2.40 |
| spr0069     | Hypothetical protein                                  |         | -2.97                                   | -2.76 |      |          |       |       |
| spr0070     | Trk transporter membrane-spanning protein - K+        |         | -2.70                                   | -2.24 |      |          |       |       |
| spr0071     | Trk transporter NAD+ binding protein - K+             |         | -2.13                                   |       |      |          |       |       |
| spr0072     | Conserved hypothetical protein                        |         | -2.18                                   |       |      |          |       |       |
| spr0073     | Hypothetical protein                                  |         |                                         | -2.04 |      |          |       |       |
| spr0074     | Hypothetical protein                                  |         |                                         | -2.05 |      |          |       |       |
| spr0081     | ABCT membrane-spanning permease - sugar               |         |                                         |       |      |          | 4.77  | 6.92  |
| spr0082     | ABCT membrane spanning permease - sugar               |         |                                         |       |      |          | 3.74  | 6.52  |
| spr0083     | ABCT solute binding protein - sugar                   |         |                                         |       |      |          |       | 2.35  |
| spr0089     | Conserved hypothetical protein                        |         | -2.11                                   |       |      |          |       |       |
| spr0090     | Conserved hypothetical protein                        |         | -2.69                                   | -2.47 |      |          |       |       |

|         |                                                  |   |       |       |       |       |       |       |
|---------|--------------------------------------------------|---|-------|-------|-------|-------|-------|-------|
| spr0092 | CapD protein, biosynthesis of type 1 capsule     |   | -2.09 | -2.21 |       |       |       |       |
| spr0102 | Argininosuccinate synthase                       |   |       | -2.35 |       |       |       |       |
| spr0103 | Arginine succinate lyase                         |   | -2.04 | -2.38 |       |       |       |       |
| spr0115 | Hypothetical protein                             |   |       |       |       |       | 2.27  | 2.05  |
| spr0117 | Hypothetical protein                             |   |       |       |       |       | 2.36  | 2.19  |
| spr0118 | Hypothetical protein                             |   |       |       |       |       | 2.40  | 2.22  |
| spr0119 | Hypothetical protein                             |   |       |       |       |       | 2.31  | 2.02  |
| spr0129 | Conserved hypothetical protein                   | 3 |       | 2.26  |       |       | 2.74  | 2.32  |
| spr0130 | Ribosomal protein alanine acetyltransferase      | 3 |       |       |       |       | 2.48  | 2.46  |
| spr0132 | Degenerate transposase (orf2)                    | 3 |       | 2.09  |       | 2.45  | 3.56  | 4.04  |
| spr0133 | Degenerate transposase (orf2)                    | 3 |       | 2.32  |       | 2.13  | 2.84  | 3.46  |
| spr0134 | Degenerative transposase                         | 3 |       |       |       |       | 3.16  | 3.27  |
| spr0135 | Glycosyltransferase, exopolysaccharide synthesis | 3 |       |       |       |       | 2.89  | 2.70  |
| spr0136 | Glycosyl transferase                             | 3 |       |       |       |       | 3.81  | 3.31  |
| spr0137 | ABCT ATP-binding/membrane spanning permease      | 3 |       | 2.01  |       | 2.16  | 4.12  | 4.04  |
| spr0139 | UDP-glucose DH                                   | 3 |       |       |       |       | 2.77  | 2.67  |
| spr0140 | Positive transcriptional regulator of mutA       | 3 |       |       |       |       | 2.49  | 2.56  |
| spr0141 | Hypothetical protein                             | 3 |       |       |       |       |       | 2.03  |
| spr0142 | Hypothetical protein                             | 3 |       |       |       |       | 3.04  | 3.13  |
| spr0143 | Hypothetical protein                             | 3 |       |       |       |       | 2.26  | 2.43  |
| spr0144 | Conserved hypothetical protein                   | 3 |       | 2.07  |       | 2.43  | 3.63  | 4.63  |
| spr0145 | Hypothetical protein                             | 3 | 2.60  | 3.21  |       | 2.80  | 5.02  | 7.25  |
| spr0146 | ABCT, substrate-binding protein - amino acid     | 3 |       | 2.41  |       |       | 3.32  | 3.31  |
| spr0147 | ABCT, solute-binding protein                     | 3 | 2.43  | 2.86  |       | 2.49  | 4.86  | 5.15  |
| spr0148 | Succinyl-diaminopimelic descuccinylase           | 3 |       | 2.16  |       |       | 2.47  | 2.60  |
| spr0149 | ABCT, ATP-binding protein                        | 3 |       | 2.20  |       |       | 2.82  | 2.94  |
| spr0150 | ABCT, membrane-spanning permease                 | 3 |       | 2.59  |       |       | 3.04  | 3.30  |
| spr0151 | Hypothetical protein                             | 3 | 2.30  | 2.99  |       | 2.22  | 4.51  | 5.16  |
| spr0152 | Conserved hypothetical protein                   | 3 | 2.19  | 2.46  |       | 2.69  | 4.28  | 4.44  |
| spr0153 | Histidine kinase                                 | 3 |       |       |       | 2.59  | 3.21  | 3.39  |
| spr0154 | Response regulator                               | 3 | 2.42  | 2.46  |       | 3.19  | 4.51  | 4.39  |
| spr0155 | Hypothetical protein                             | 3 |       |       |       | 2.75  | 3.34  | 3.09  |
| spr0156 | Conserved hypothetical protein                   | 3 | 2.98  | 2.97  | 2.23  | 4.25  | 6.26  | 5.08  |
| spr0157 | Conserved hypothetical protein                   | 3 | 2.94  | 2.87  |       | 4.09  | 4.92  | 3.88  |
| spr0158 | Hypothetical protein                             | 3 | 2.98  | 3.03  |       | 4.49  | 5.63  | 4.34  |
| spr0159 | Conserved hypothetical protein                   | 3 | 2.84  | 2.53  |       | 4.10  | 5.41  | 4.02  |
| spr0161 | Riboflavin synthase beta chain                   | 3 | 2.06  |       |       | 2.31  | 2.64  |       |
| spr0168 | Conserved hypothetical protein                   | 3 | 2.49  | 2.12  |       | 3.05  | 3.89  | 3.14  |
| spr0170 | Magnesium and cobalt transporter                 | 3 |       |       |       |       | 2.30  | 2.17  |
| spr0172 | Aminopeptidase P                                 | 3 |       |       |       |       | 2.02  |       |
| spr0173 | Arsenate reductase, putative                     | 3 |       |       |       |       | 2.15  | 2.04  |
| spr0174 | Hypothetical protein                             | 3 |       |       |       |       | 2.08  |       |
| spr0179 | Hypothetical protein                             | 3 |       |       |       |       | 2.33  | 2.27  |
| spr0180 | Cardiolipin synthase                             | 3 | 2.21  | 2.64  |       | 2.37  | 3.43  | 3.55  |
| spr0181 | Orf47                                            | 3 |       |       |       |       | 2.05  |       |
| spr0208 | 50S Ribosomal protein L15                        |   |       |       |       | -2.05 |       |       |
| spr0210 | Adenylate kinase                                 |   |       |       |       | 2.24  | 2.86  |       |
| spr0218 | Conserved hypothetical protein                   |   |       |       |       |       | -2.09 | -2.25 |
| spr0232 | Formate acetyltransferase 3                      | 4 | -2.15 | -2.11 |       |       |       |       |
| spr0235 | Leucyl-tRNA synthetase                           | 4 | -2.21 |       |       |       | -2.07 | -2.01 |
| spr0236 | Conserved hypothetical protein                   | 4 | -2.98 | -2.49 |       | -3.27 | -2.60 | -2.14 |
| spr0237 | Conserved hypothetical protein                   | 4 | -2.83 | -2.41 |       | -2.64 | -2.22 |       |
| spr0238 | Branch migration of Holliday structures          | 4 | -2.48 |       |       |       |       |       |
| spr0239 | Hypothetical protein                             | 4 | -2.16 |       |       |       |       |       |
| spr0240 | Undecaprenyl diphosphate synthase                | 4 | -2.03 |       |       |       |       |       |
| spr0244 | 6-P-beta-glucosidase                             | 4 |       |       |       |       | -2.16 | -2.09 |
| spr0245 | L-glutamine-D-fructose-6-P amidotransferase      | 4 | -5.56 | -4.90 |       | -5.65 | -5.92 | -4.14 |
| spr0246 | Conserved hypothetical protein                   | 4 | -2.56 | -2.17 |       | -3.05 | -3.12 | -3.01 |
| spr0247 | Alkaline amylopullulanase                        | 4 | -3.32 | -3.21 |       | -4.30 | -4.68 | -3.27 |
| spr0251 | DNA polymerase III, alpha subunit                | 4 | -2.42 | -2.19 |       | -2.42 | -3.38 | -2.73 |
| spr0252 | Hypothetical protein                             | 4 | -3.01 | -2.67 |       | -3.54 | -3.57 | -3.63 |
| spr0253 | Conserved hypothetical protein                   | 4 | -3.83 | -3.73 |       | -4.46 | -4.35 | -3.49 |
| spr0254 | Aminopeptidase                                   | 4 | -3.97 | -4.43 | -2.19 |       | -5.51 | -4.24 |
| spr0255 | Conserved hypothetical protein                   | 4 | -3.40 | -3.27 |       | -4.69 | -4.78 | -3.96 |

|         |                                                     |   |       |       |       |       |       |       |
|---------|-----------------------------------------------------|---|-------|-------|-------|-------|-------|-------|
| spr0256 | Ribosomal small subunit pseudouridine synthase A    | 4 | -2.02 |       |       | -2.09 | -2.47 | -2.68 |
| spr0257 | Hypothetical protein                                | 4 |       | -2.07 |       |       |       |       |
| spr0258 | Aminopeptidase C                                    | 4 |       | -3.11 |       |       | -2.89 | -3.20 |
| spr0259 | PTS, mannose-specific EIID                          | 4 |       | -3.88 | -2.32 |       |       | -2.08 |
| spr0260 | PTS, mannose-specific EIIC                          | 4 | -2.12 | -5.33 | -2.39 |       |       | -2.92 |
| spr0261 | PTS, mannose-specific EIIB                          | 4 | -2.55 | -3.72 |       | -2.55 | -3.83 | -3.18 |
| spr0262 | Alcohol DH, propanol-preferring                     | 4 | -3.00 | -2.94 |       | -4.66 | -4.02 | -2.86 |
| spr0263 | Conserved hypothetical protein                      | 4 | -7.26 | -4.31 |       | -8.46 | -8.13 | -5.79 |
| spr0264 | Conserved hypothetical protein                      | 4 |       |       |       | -3.32 | -4.18 | -3.51 |
| spr0265 | Conserved hypothetical protein                      | 4 |       |       |       | -3.06 | -4.07 | -3.61 |
| spr0266 | Dihydropteroate synthase                            | 4 | -2.17 | -4.11 |       | -5.40 | -7.37 | -6.44 |
| spr0267 | Dihydrofolate synthetase                            | 4 | -2.78 | -4.70 |       | -4.03 | -6.47 | -6.03 |
| spr0268 | GTP cyclohydrolase                                  | 4 | -2.51 | -4.15 |       | -3.44 | -5.79 | -5.76 |
| spr0269 | Aldolase-pyro-P-kinase                              | 4 | -2.31 | -3.09 |       | -3.40 | -3.98 | -4.64 |
| spr0270 | Hypothetical protein                                | 4 |       |       |       | -4.94 | -3.91 | -4.00 |
| spr0271 | 50S Ribosomal protein L13                           | 4 |       |       |       |       |       | -2.76 |
| spr0272 | 30S Ribosomal protein S9                            | 4 |       |       |       |       |       | -3.03 |
| spr0284 | Alpha-xylosidase                                    |   | -2.20 |       |       | -2.04 | -2.45 | -2.34 |
| spr0309 | Hypothetical protein                                |   | -2.23 |       |       | -2.13 | -2.28 | -2.01 |
| spr0318 | Type 2 capsule                                      |   | -2.40 | -2.54 | -2.07 |       | -2.26 | -2.21 |
| spr0319 | Type 2 capsule                                      |   | -2.41 | -2.69 | -2.21 |       | -2.50 | -2.58 |
| spr0320 | Type 2 capsule                                      |   | -2.87 | -3.42 | -2.67 |       | -3.31 | -3.02 |
| spr0321 | Type 2 capsule                                      |   | -3.00 | -3.48 | -2.86 |       | -3.04 | -2.96 |
| spr0322 | dTDP-glucose-4,6-dehydratase                        |   | -2.95 | -3.37 | -2.72 |       | -3.03 | -3.12 |
| spr0323 | dTDP-L-rhamnose synthase                            |   |       | -2.26 |       |       |       | -2.15 |
| spr0327 | ABCT, substrate-binding protein – oligopeptide      |   | -2.30 | -2.47 | -2.42 |       | -4.20 | -3.97 |
| spr0337 | Choline-binding protein F                           |   |       |       |       |       | 2.18  |       |
| spr0392 | Elongation factor P                                 |   |       |       |       |       | 2.26  | 2.18  |
| spr0397 | Conserved hypothetical protein                      |   |       |       |       |       | 2.43  | 2.05  |
| spr0398 | 50S Ribosomal protein L28                           |   |       |       |       |       | 2.60  |       |
| spr0401 | Acetolactate synthase large subunit                 |   |       | -2.06 |       |       | -2.08 | -2.48 |
| spr0402 | Acetolactate synthase small subunit                 |   |       | -2.30 |       |       |       | -2.38 |
| spr0416 | Hypothetical protein                                | 5 |       |       |       | 2.06  | 3.87  | 2.76  |
| spr0417 | Conserved hypothetical protein                      | 5 |       |       |       | 2.16  | 4.02  | 3.23  |
| spr0418 | Hypothetical protein                                | 5 |       |       |       | 2.20  | 4.11  | 2.55  |
| spr0419 | Hypothetical protein                                | 5 |       |       |       | 2.39  | 3.64  | 3.21  |
| spr0420 | Xylose repressor protein                            | 5 |       |       |       | 2.00  | 2.96  | 2.35  |
| spr0421 | PTS, sugar-specific EII component                   | 5 |       |       |       | 2.33  | 4.38  | 3.87  |
| spr0422 | Hypothetical protein                                | 5 |       |       |       | 2.35  | 3.62  | 3.19  |
| spr0423 | PTS, sugar-specific EII component                   | 5 |       |       |       | 2.15  | 3.49  | 3.17  |
| spr0424 | P-beta-D-galactosidase                              | 5 |       |       |       |       | 3.05  | 2.70  |
| spr0425 | PTS, sugar-specific EII component                   | 5 |       |       |       |       | 2.11  |       |
| spr0428 | Conserved hypothetical protein                      | 5 |       |       |       |       | 2.56  | 2.46  |
| spr0429 | Conserved hypothetical protein                      | 5 |       |       |       |       | 2.87  | 2.79  |
| spr0430 | ABCT, ATP-binding protein – cobalt                  | 5 |       |       |       |       | 2.02  | 2.00  |
| spr0431 | ABCT, membrane-spanning permease                    | 5 |       |       |       |       | 2.02  | 2.00  |
| spr0432 | rRNA methylase                                      | 5 |       | 2.31  |       | 2.18  | 3.99  | 4.07  |
| spr0437 | RNA polymerase delta subunit                        | 5 | 3.47  | 3.58  |       | 4.51  | 10.86 | 10.75 |
| spr0440 | Hypothetical protein                                | 5 |       |       |       | 2.05  | 2.48  | 2.30  |
| spr0442 | Hypothetical protein                                | 5 |       | 2.08  |       |       | 2.64  | 2.72  |
| spr0445 | Type I restriction enzyme                           | 5 | 2.05  | 2.09  |       | 3.10  | 4.67  | 2.87  |
| spr0446 | Type I restriction enzyme EcoKI specificity protein | 5 | 2.17  | 2.24  |       | 3.22  | 4.42  | 3.10  |
| spr0447 | Integrase/recombinase                               | 5 | 2.40  |       |       | 3.38  | 4.78  | 4.09  |
| spr0448 | Type I site-specific deoxyribonuclease chain S      | 5 |       |       |       | 2.23  | 2.72  | 2.29  |
| spr0449 | EcoE type I restriction-modification, M subunit     | 5 |       |       |       | 2.08  | 2.27  | 2.21  |
| spr0450 | EcoA type I restriction-modification, R subunit     | 5 |       |       |       | 2.10  | 2.33  | 2.24  |
| spr0451 | Hypothetical protein                                | 5 |       |       |       |       | 2.69  | 2.60  |
| spr0452 | Hypothetical protein                                | 5 |       |       |       | 2.64  | 4.60  | 4.65  |
| spr0456 | Heat-shock protein                                  | 5 |       |       |       |       | 2.12  | 2.00  |
| spr0457 | Hypothetical protein                                | 5 |       | 2.15  |       | 2.49  | 3.13  | 4.19  |
| spr0458 | Conserved hypothetical protein                      | 5 | 2.47  | 2.86  | 3.05  | 3.30  | 4.74  | 7.47  |
| spr0459 | ABCT, ATP-binding protein                           | 5 |       | 2.13  | 2.26  | 2.19  | 2.69  | 3.69  |
| spr0461 | Hypothetical protein                                | 5 |       | 2.09  | 2.63  |       | 2.78  | 3.46  |
| spr0465 | Bacteriocin-like peptide                            | 5 | 2.33  | 2.40  | 2.06  |       |       |       |

|         |                                                |   |      |       |       |      |       |       |
|---------|------------------------------------------------|---|------|-------|-------|------|-------|-------|
| spr0469 | Conserved hypothetical protein                 | 5 |      |       | 2.36  |      | 3.04  | 3.70  |
| spr0470 | Hypothetical protein                           | 5 |      | 2.26  |       |      | 3.20  | 3.14  |
| spr0471 | Hypothetical protein                           | 5 |      |       |       |      | 2.75  | 2.55  |
| spr0474 | ABCT, ATP binding protein                      | 5 |      |       |       |      | 2.14  | 2.16  |
| spr0475 | Conserved hypothetical protein                 | 5 |      |       |       |      | 2.11  | 2.28  |
| spr0476 | Conserved hypothetical protein                 | 5 | 2.74 | 3.83  | 3.07  | 3.11 | 5.51  | 7.49  |
| spr0477 | Conserved hypothetical protein                 | 5 | 2.16 | 2.51  | 2.13  | 2.87 | 4.08  | 4.55  |
| spr0481 | Initiation factor IF2                          | 5 |      |       |       |      | 2.17  | 2.30  |
| spr0482 | Ribosome binding factor A                      | 5 | 2.82 | 3.56  |       | 4.72 | 7.27  | 8.25  |
| spr0483 | Conserved hypothetical protein                 | 5 |      |       |       |      |       | 2.61  |
| spr0484 | Hypothetical protein                           | 5 |      |       |       |      | 2.19  | 2.34  |
| spr0489 | Hypothetical protein                           |   |      |       |       |      | -2.60 | -3.16 |
| spr0490 | Conserved hypothetical protein                 |   |      | -2.06 |       |      | -2.95 | -3.90 |
| spr0491 | Hypothetical protein                           |   |      |       |       |      | -2.28 | -3.06 |
| spr0492 | Valyl-tRNA synthetase                          |   |      |       |       |      |       | -2.36 |
| spr0494 | Hypothetical protein                           |   |      |       |       |      |       | -2.14 |
| spr0507 | Phe-tRNA synthetase alpha chain                |   |      |       |       |      | -2.13 | -2.92 |
| spr0508 | Conserved hypothetical protein                 |   |      |       |       |      |       | -2.54 |
| spr0509 | Phe-tRNA synthetase beta chain                 |   |      |       |       |      |       | -2.45 |
| spr0511 | Degenerate transposase                         |   |      |       |       |      | -2.06 | -2.07 |
| spr0514 | Tetrahydropteroyl triGlu methyltransferase     |   |      |       |       |      | -2.48 | -2.73 |
| spr0515 | 5,10-methylenetetrahydrofolate reductase       |   |      |       | -2.10 |      | -2.12 | -2.54 |
| spr0525 | ABCT, ATP-binding protein - peptide            |   |      |       |       | 2.47 | 2.16  |       |
| spr0526 | ABCT, membrane-spanning permease - peptide     |   |      |       |       | 2.63 | 2.33  | 2.12  |
| spr0527 | Peptide which is the signal sensed by VncR/S   |   | 2.00 |       |       | 3.43 | 3.98  | 2.80  |
| spr0528 | VncR, response regulator                       |   |      |       |       | 2.20 | 2.05  |       |
| spr0531 | Hypothetical protein                           |   | 2.40 | 2.90  | 2.09  | 2.63 | 3.43  | 4.06  |
| spr0532 | ABCT, membrane-spanning permease – Gln         |   |      | 2.28  |       |      |       | 2.04  |
| spr0537 | Single-stranded DNA-specific exonuclease       |   |      |       |       |      | -2.27 | -2.31 |
| spr0542 | Hypothetical protein                           |   |      |       | 2.01  |      |       |       |
| spr0562 | PTS, sugar-specific EII component              |   |      |       |       |      | 2.87  | 3.01  |
| spr0563 | Hypothetical protein                           |   |      |       |       |      | 2.61  | 3.16  |
| spr0594 | Conserved hypothetical protein                 |   |      |       |       |      | 2.79  | 2.46  |
| spr0599 | Hypothetical protein                           |   |      |       | -2.00 |      |       |       |
| spr0607 | Hypothetical protein                           |   |      |       |       | 2.26 | 2.95  |       |
| spr0608 | Hypothetical protein                           |   |      |       |       | 2.63 | 3.62  | 2.38  |
| spr0610 | ABCT, ATP-binding protein                      |   |      |       |       | 2.36 | 2.73  | 2.31  |
| spr0611 | Hypothetical protein                           |   |      |       |       | 2.92 | 3.05  |       |
| spr0613 | Orotidine-5-decarboxylase                      |   |      | -2.02 | -2.23 |      |       |       |
| spr0614 | Orotate P-ribosyltransferase                   |   |      | -2.14 | -2.23 |      |       |       |
| spr0623 | ABCT, membrane-spanning permease – Gln         |   |      |       |       |      |       | 2.61  |
| spr0624 | ABCT, membrane-spanning permease –Gln          |   |      |       |       |      |       | 2.28  |
| spr0625 | Lactate oxidase                                |   |      |       |       |      |       | 2.49  |
| spr0644 | Degenerate transposase                         | 6 | 2.38 | 2.30  |       | 2.54 | 2.82  | 2.84  |
| spr0645 | Hypothetical protein                           | 6 | 2.05 |       |       | 2.56 | 2.90  | 2.71  |
| spr0647 | Mannose-6-P isomerise                          | 6 |      | 2.48  |       |      |       |       |
| spr0655 | Uracil P-ribosyltransferase                    | 6 | 2.16 | 2.58  |       | 2.59 | 2.51  | 2.07  |
| spr0656 | ATP-dependent Clp protease proteolytic subunit | 6 | 2.43 | 2.56  |       | 2.95 | 2.80  | 2.48  |
| spr0663 | ABCT, ATP-binding protein - branched chain AA  | 6 | 2.16 |       |       |      |       |       |
| spr0664 | Conserved hypothetical protein                 | 6 | 2.26 | 2.12  |       | 3.71 | 3.14  | 2.47  |
| spr0667 | Cell division protein FtsX                     | 6 | 2.17 |       |       | 2.51 | 2.36  |       |
| spr0669 | Hypothetical protein                           | 6 | 2.24 | 2.06  |       | 2.75 | 2.45  | 2.31  |
| spr0679 | Peptidyl-prolyl cis-trans isomerise            | 6 |      | 2.40  |       |      |       |       |
| spr0683 | Conserved hypothetical protein                 | 6 |      |       | -2.28 |      |       |       |
| spr0688 | Hypothetical protein                           | 6 | 2.18 |       |       | 2.58 | 3.07  | 2.61  |
| spr0689 | Hypothetical protein                           | 6 | 2.08 | 2.27  |       | 2.32 | 2.46  | 2.30  |
| spr0690 | Conserved hypothetical protein                 | 6 |      | 2.51  |       |      |       |       |
| spr0699 | Conserved hypothetical protein                 | 6 |      | 2.00  |       |      |       |       |
| spr0700 | Hypothetical protein                           | 6 |      | 2.50  |       |      | 2.34  | 2.18  |
| spr0703 | Hypothetical protein                           | 6 |      |       |       |      | 2.07  |       |
| spr0707 | Response regulator, transcriptional regulation | 6 |      |       |       | 2.14 | 2.47  | 2.08  |
| spr0709 | Hypothetical protein                           | 6 | 4.28 | 4.68  | 2.93  | 7.63 | 8.56  | 8.62  |
| spr0710 | Conserved hypothetical protein                 | 6 |      | 2.22  |       | 2.62 | 2.99  | 2.91  |
| spr0711 | ATP-dependent DNA helicase                     | 6 |      |       |       | 2.12 | 2.56  | 2.37  |

|         |                                                  |   |       |       |       |       |       |       |
|---------|--------------------------------------------------|---|-------|-------|-------|-------|-------|-------|
| spr0712 | Rod shape determining protein                    | 6 |       |       |       | 2.12  | 2.18  | 2.10  |
| spr0713 | 4-methyl-5-thiazole mono-P biosynthesis          | 6 | 2.15  | 2.06  |       | 2.79  | 2.98  | 2.78  |
| spr0714 | Phosphoglycolate phosphatase                     | 6 |       |       |       | 2.40  | 2.66  | 2.48  |
| spr0717 | Transposase                                      | 6 | 2.12  |       |       | 2.64  | 3.01  | 2.86  |
| spr0718 | Transposase                                      | 6 | 2.32  | 2.24  |       | 2.52  | 2.81  | 2.77  |
| spr0720 | Hypothetical protein                             | 6 |       | 2.01  |       | 2.34  | 2.85  | 2.69  |
| spr0721 | Conserved hypothetical protein                   | 6 | 3.22  | 3.22  |       | 4.07  | 4.94  | 4.51  |
| spr0738 | Purine nucleoside phosphorylase                  |   | 2.08  |       |       |       |       |       |
| spr0739 | Modulates DNA topology                           |   |       | 2.36  | 2.23  |       |       |       |
| spr0740 | 30S Ribosomal protein subunit S20                |   |       |       | 2.17  |       |       |       |
| spr0742 | Hypothetical protein                             |   | 2.25  | 2.38  |       |       |       |       |
| spr0756 | Topoisomerase IV subunit B                       |   |       |       |       |       | -2.89 | -2.58 |
| spr0757 | Topoisomerase IV subunit A                       |   |       |       |       |       | -2.98 | -2.45 |
| spr0758 | Branched-chain-AA transaminase                   |   |       |       |       |       | -3.29 | -2.81 |
| spr0759 | ABCT, substrate-binding protein - oligopeptide   |   |       |       |       |       | -2.73 | -2.42 |
| spr0760 | Conserved hypothetical protein                   |   |       |       |       |       | -2.76 | -2.85 |
| spr0761 | Conserved hypothetical protein                   |   |       |       |       |       |       | -2.13 |
| spr0776 | D-Ala-D-Ala carboxypeptidase                     |   |       |       |       |       | -2.14 | -2.24 |
| spr0778 | Transcriptional repressor of the fructose operon |   |       |       |       | -5.13 | -2.57 | -2.10 |
| spr0782 | Hypothetical protein                             |   |       |       |       | -2.47 | -2.46 | -2.14 |
| spr0783 | Probable pyridoxal-P dependent aminotransferase  |   |       |       |       |       | -2.70 | -2.67 |
| spr0784 | Thiamin biosynthesis protein                     |   |       |       |       | -2.02 | -2.60 | -2.62 |
| spr0787 | Hypothetical protein                             |   |       |       |       |       |       | -2.00 |
| spr0794 | Xaa-pro dipeptidyl-peptidase                     |   |       |       |       |       |       | -2.22 |
| spr0815 | Degenerate transposase                           |   |       |       |       |       | -2.46 | -2.23 |
| spr0816 | Lysine decarboxylase                             |   |       |       |       | -2.06 | -2.88 |       |
| spr0818 | Degenerate transposase                           |   |       |       |       | -2.07 | -2.60 | -2.10 |
| spr0825 | Hypothetical protein                             |   |       |       | 3.94  |       |       |       |
| spr0826 | Hypothetical protein                             |   |       |       | 4.03  |       |       |       |
| spr0841 | Tranposase (orf2)                                |   |       |       |       |       | 2.40  |       |
| spr0856 | Competence protein                               | 7 | -2.48 |       |       | -2.20 | -3.40 | -3.92 |
| spr0857 | Competence protein                               | 7 |       |       |       |       | -2.02 | -2.19 |
| spr0858 | Hypothetical protein                             | 7 |       |       |       |       | -2.38 | -2.94 |
| spr0859 | Hypothetical protein                             | 7 | -2.24 |       |       |       | -2.75 | -3.42 |
| spr0860 | Hypothetical protein                             | 7 |       |       |       |       | -2.29 | -2.49 |
| spr0863 | 50S Ribosomal protein L20                        | 7 |       |       |       | -2.25 |       |       |
| spr0864 | Lactoylglutathione lyase                         | 7 |       |       |       | -2.20 |       |       |
| spr0865 | Dihydroorotate DH                                | 7 |       |       |       |       |       | -3.79 |
| spr0866 | Dihydroorotate DH                                | 7 |       |       |       |       | -2.32 |       |
| spr0868 | Fibronectin-binding protein-like protein A       | 7 | -2.27 |       |       |       | -2.42 | -2.60 |
| spr0869 | Conserved hypothetical protein                   | 7 |       |       |       | -3.36 | -2.69 | -2.31 |
| spr0870 | Diacylglycerol kinase                            | 7 | -2.53 | -2.25 |       | -5.20 | -3.96 | -3.01 |
| spr0871 | GTPase/GTP-binding protein                       | 7 | -2.19 |       |       | -4.22 | -3.29 | -2.52 |
| spr0872 | Formamidopyrimidine-DNA glycosylase              | 7 | -2.11 | -2.16 |       | -3.40 | -3.46 | -2.70 |
| spr0873 | Conserved hypothetical protein                   | 7 | -2.07 |       |       | -3.48 | -3.23 | -2.68 |
| spr0874 | Hypothetical protein                             | 7 | -2.00 |       |       | -3.34 | -3.18 | -2.43 |
| spr0875 | Multi-drug resistance efflux pump                | 7 |       |       |       | -3.38 | -3.15 | -2.54 |
| spr0876 | 50S Ribosomal protein L33                        | 7 |       |       |       | -2.66 | -2.33 | -2.24 |
| spr0877 | Protein-export membrane protein secG             | 7 | -2.09 |       |       | -3.54 | -2.81 | -2.34 |
| spr0878 | Exoribonuclease R                                | 7 |       |       |       | -3.99 | -2.48 |       |
| spr0879 | Small protein B                                  | 7 |       |       |       | -4.94 | -2.68 | -2.46 |
| spr0880 | Tellurite resistance                             | 7 |       |       |       | -5.20 | -2.97 | -2.61 |
| spr0881 | Competence protein                               | 7 |       |       |       | -3.08 | -2.56 | -2.55 |
| spr0888 | Regulatory protein                               | 7 | -2.37 |       |       | -2.17 | -2.16 |       |
| spr0889 | Conserved hypothetical protein                   | 7 | -2.46 |       |       | -3.65 | -2.40 | -2.11 |
| spr0903 | Cytochrome c-type biogenesis protein             | 7 | -2.06 |       |       | -4.23 | -2.78 | -2.24 |
| spr0904 | Conserved hypothetical protein                   | 7 |       |       |       | -3.37 | -2.43 | -2.15 |
| spr0905 | Cationic amino acid transporter                  | 7 | -2.37 | -2.50 | -2.70 | -4.29 | -3.67 | -3.40 |
| spr0906 | Lipoprotein                                      | 7 | -2.13 | -2.40 | -3.05 | -4.02 | -3.61 | -4.28 |
| spr0907 | His triad protein D precursor                    | 7 |       |       |       | -2.58 | -2.17 | -2.96 |
| spr0908 | His triad protein E precursor                    | 7 |       |       |       | -3.46 | -2.63 | -2.63 |
| spr0913 | Aminotripeptidase; tripeptidase                  | 7 |       |       |       |       | -2.51 | -2.28 |
| spr0914 | Ferrochelataase                                  | 7 |       |       |       |       | -3.00 | -2.11 |
| spr0921 | 4-oxalocrotonate tautomerase                     | 7 |       |       | 2.09  |       |       |       |

|         |                                                    |   |       |       |       |       |       |       |
|---------|----------------------------------------------------|---|-------|-------|-------|-------|-------|-------|
| spr0925 | HemK protein                                       | 7 |       |       |       | -3.03 | -2.52 | -2.21 |
| spr0929 | Hypothetical protein                               | 7 |       |       |       | -2.36 | -2.23 |       |
| spr0930 | Conserved hypothetical protein                     | 7 |       |       |       | -2.54 | -2.25 |       |
| spr0931 | Conserved hypothetical protein                     | 7 | -2.95 | -2.31 |       | -6.02 | -4.57 | -4.50 |
| spr0932 | Conserved hypothetical protein                     | 7 | -2.14 |       |       | -4.75 | -3.54 | -2.83 |
| spr0945 | Hypothetical protein                               |   |       |       | 2.57  |       |       |       |
| spr0946 | Conserved hypothetical protein                     |   |       |       | 2.35  |       |       |       |
| spr0977 | ABCT, ATP-binding protein                          |   |       |       | -2.01 |       |       |       |
| spr0980 | Conserved hypothetical protein                     |   |       |       | -2.01 |       |       |       |
| spr0989 | UDP-N-acetylglucosamine 1-carboxyvinyl transferase | 8 | -3.91 | -3.09 | -2.00 | -5.82 | -4.15 | -3.50 |
| spr0990 | Conserved hypothetical protein                     | 8 | -3.77 | -3.63 | -2.54 | -2.69 | -3.81 | -3.95 |
| spr0991 | Conserved hypothetical protein                     | 8 | -2.72 | -2.88 |       |       | -2.73 | -2.32 |
| spr0992 | Methionine aminopeptidase                          | 8 | -2.92 | -2.85 | -2.12 | -2.31 | -3.21 | -2.65 |
| spr0993 | Degenerate transposase (orf1)                      | 8 |       |       |       | -2.18 | -2.00 |       |
| spr0994 | Tranposase (orf2)                                  | 8 |       |       |       |       | 2.14  | 2.01  |
| spr0995 | ATP-dependent DNA helicase                         | 8 |       |       |       | -2.64 | -2.57 |       |
| spr0996 | DNA repair protein                                 | 8 | -2.47 |       |       | -3.88 | -3.62 | -3.28 |
| spr0997 | Conserved hypothetical protein                     | 8 |       |       |       | -3.03 | -2.90 | -2.33 |
| spr1007 | Phosphate acetyltransferase                        | 8 |       |       |       | -2.92 | -2.35 |       |
| spr1011 | Conserved hypothetical protein                     | 8 |       |       |       | -2.56 |       |       |
| spr1020 | Histone-like DNA-binding protein                   | 8 |       |       |       | -3.12 | -3.09 | -2.80 |
| spr1021 | ABCT, ATP-binding protein                          | 8 | -3.04 | -2.08 |       | -4.64 | -3.91 | -2.45 |
| spr1022 | Transcriptional regulator                          | 8 | -2.70 | -2.00 |       | -3.72 | -3.48 | -2.77 |
| spr1023 | ABCT, membrane-spanning permease - macrolides      | 8 |       |       |       | -2.20 | -2.00 |       |
| spr1024 | DNA ligase                                         | 8 | -2.35 |       |       | -3.53 | -2.60 | -2.02 |
| spr1028 | NADP-dependent glyceraldehyde-3-P DH               | 8 | -2.70 | -4.76 | -4.00 |       | -2.90 | -3.78 |
| spr1029 | 1,4-alpha-glucan branching enzyme                  | 8 |       |       |       |       | 2.90  | 3.55  |
| spr1034 | Glycerate kinase                                   | 8 | -2.15 | -2.02 |       | -3.00 | -2.73 | -2.48 |
| spr1036 | Enolase                                            | 8 |       |       |       |       | -2.83 | -2.49 |
| spr1039 | Second subunit of major exonuclease                | 8 | -3.80 | -3.61 | -2.95 | -2.06 | -3.13 | -3.31 |
| spr1040 | First subunit of major exonuclease                 | 8 | -3.39 | -3.95 | -3.46 | -2.15 | -3.17 | -3.59 |
| spr1041 | Hypothetical protein                               | 8 | -3.33 | -3.04 | -2.63 |       | -2.63 | -3.08 |
| spr1042 | Immunoglobulin A1 protease                         | 8 | -2.16 | -2.43 | -2.00 | -2.02 | -2.16 | -2.07 |
| spr1043 | Conserved hypothetical protein                     | 8 | -4.67 | -4.20 | -2.78 | -5.48 | -5.42 | -5.32 |
| spr1044 | Ribonuclease H                                     | 8 | -4.73 | -4.62 | -3.01 | -5.14 | -5.55 | -5.11 |
| spr1045 | Conserved hypothetical protein                     | 8 | -3.32 | -3.47 | -3.05 | -2.88 | -3.71 | -3.98 |
| spr1050 | TPP-dependent acetoin DH beta chain                | 8 | -2.20 |       |       | -3.31 | -2.79 | -2.05 |
| spr1051 | TPP-dependent acetoin DH alpha chain               | 8 |       |       |       | -3.69 | -2.66 |       |
| spr1060 | Histidine motif-containing protein                 | 8 |       |       |       |       |       | -2.29 |
| spr1061 | His triad protein A precursor                      | 8 |       |       |       |       | -2.32 | -2.33 |
| spr1078 | Degenerate transposase                             |   |       |       |       |       | 2.14  |       |
| spr1080 | Hypothetical protein                               |   |       |       |       |       | 2.62  | 3.15  |
| spr1109 | Formate-tetrahydrofolate ligase                    |   | 2.42  |       |       |       |       |       |
| spr1110 | Similar to C-terminus of the Dfp protein           |   | 2.07  | 3.05  | 2.51  |       |       |       |
| spr1112 | Conserved hypothetical protein                     |   |       | 3.42  | 2.31  | 2.78  | 4.25  | 2.55  |
| spr1119 | Conserved hypothetical protein                     |   |       | 2.18  |       |       |       |       |
| spr1122 | Glucose-6-P 1-DH                                   |   |       | 2.00  |       |       |       |       |
| spr1128 | GMP reductase                                      |   |       |       | -2.40 |       |       |       |
| spr1132 | Hypothetical protein                               | 9 |       |       |       | -2.33 | -2.16 | -2.11 |
| spr1133 | 3-isopropylmalate dehydratase small subunit        | 9 | -2.24 |       | -2.27 | -3.29 | -3.11 | -2.80 |
| spr1134 | Conserved hypothetical protein                     | 9 | -2.38 | -2.49 | -2.59 | -3.42 | -3.14 | -3.11 |
| spr1135 | 3-isopropylmalate DH                               | 9 | -2.52 | -2.61 | -2.45 | -3.78 | -4.31 | -3.87 |
| spr1136 | 2-isopropylmalate synthase                         | 9 | -2.96 | -3.36 | -2.94 | -4.58 | -6.00 | -4.68 |
| spr1137 | 2-isopropylmalate synthase                         | 9 | -3.01 | -3.23 | -2.74 | -4.64 | -5.43 | -4.41 |
| spr1138 | Hypothetical protein                               | 9 | -3.02 | -3.19 | -2.65 | -4.61 | -5.49 | -4.37 |
| spr1139 | Copper sensitivity                                 | 9 | -3.04 | -3.24 | -2.56 | -5.81 | -6.28 | -5.18 |
| spr1140 | Conserved hypothetical protein                     | 9 | -2.81 | -2.66 | -2.30 | -4.90 | -4.54 | -4.29 |
| spr1141 | DNA topoisomerase I                                | 9 | -3.91 | -4.36 | -3.46 | -4.73 | -6.28 | -5.26 |
| spr1142 | Conserved hypothetical protein                     | 9 | -2.73 | -2.76 |       | -6.01 | -4.96 | -3.43 |
| spr1143 | Hypothetical protein                               | 9 |       |       |       | -2.19 |       |       |
| spr1144 | DNA processing Smf protein                         | 9 | -2.32 | -2.02 |       | -5.73 | -4.33 | -2.93 |
| spr1149 | Conserved hypothetical protein                     | 9 |       |       |       | -6.62 | -3.14 | -2.38 |
| spr1157 | Endonuclease III                                   |   |       | -2.04 | -2.08 |       |       | -4.59 |

|         |                                                  |           |       |       |  |  |       |       |       |       |
|---------|--------------------------------------------------|-----------|-------|-------|--|--|-------|-------|-------|-------|
| spr1170 | Conserved hypothetical protein                   |           |       |       |  |  |       |       |       | -2.17 |
| spr1176 | Conserved hypothetical protein                   |           |       |       |  |  |       | -2.78 | -2.47 | -2.46 |
| spr1180 | Degenerate transposase                           |           |       |       |  |  |       |       | 2.11  | 2.12  |
| spr1183 | ABCT, ATP-binding protein - possibly multidrug   |           |       |       |  |  |       | -2.11 |       |       |
| spr1186 | N-acetylneuraminase lyase subunit                |           |       |       |  |  |       |       |       | 2.02  |
| spr1187 | N-acetylneuraminase lyase subunit                | 2.04      | 2.56  |       |  |  |       |       | 2.00  | 3.36  |
| spr1196 | N-acetylmannosamine-6-P epimerase                |           |       |       |  |  |       |       | 2.53  | 2.37  |
| spr1197 | Degenerate transposase (orf2)                    |           |       |       |  |  |       |       | 2.12  | 2.04  |
| spr1202 | ABCT, ATP-binding protein - unknown substrate    |           |       |       |  |  |       | -2.09 |       | -2.04 |
| spr1204 | Protease II (oligopeptidase B)                   |           |       |       |  |  |       | -2.13 |       | -2.01 |
| spr1205 | Conserved hypothetical protein                   |           |       |       |  |  |       | -2.42 | -2.20 | -2.49 |
| spr1214 | N-ethylmethylamine chlorohydrolase               | -2.41     | -3.36 |       |  |  |       | -2.26 | -3.97 | -3.58 |
| spr1215 | ABCT, ATP-binding/membrane-spanning protein      | -2.18     | -3.42 |       |  |  | -2.04 |       | -2.91 | -2.39 |
| spr1216 | ABCT, ATP-binding/membrane-spanning protein      | -2.35     | -3.16 |       |  |  |       |       | -2.50 | -2.12 |
| spr1217 | Peptide Met sulfoxide reductase                  | -2.36     | -2.79 |       |  |  |       | -2.29 | -2.90 | -2.57 |
| spr1218 | Homoserine kinase                                | -3.08     | -4.05 |       |  |  | -2.14 | -2.91 | -4.40 | -3.86 |
| spr1219 | Homoserine DH                                    | -2.91     | -3.66 |       |  |  | -2.02 | -2.78 | -3.95 | -3.66 |
| spr1237 | Hypothetical protein                             | -3.21     | -2.16 |       |  |  |       | -4.87 | -2.73 | -2.14 |
| spr1238 | ABCT, ATP-binding protein                        | -2.30     | -2.11 |       |  |  |       |       |       |       |
| spr1240 | Alanyl-tRNA synthetase                           |           |       |       |  |  |       |       | -2.09 | -2.45 |
| spr1248 | Conserved hypothetical protein                   |           |       |       |  |  |       |       | -2.02 |       |
| spr1249 | Alpha-acetolactate decarboxylase                 |           |       |       |  |  |       |       | -2.67 | -3.14 |
| spr1266 | Coproporphyrinogen III oxidase                   |           |       |       |  |  |       | 2.20  | 2.12  | 2.10  |
| spr1271 | 30S Ribosomal protein S21                        | 2.28      | 2.38  |       |  |  |       | 2.56  | 3.52  | 2.92  |
| spr1300 | Gln amidotransferase                             | <b>10</b> |       |       |  |  |       |       |       | -2.74 |
| spr1310 | Peptide deformylase                              | <b>10</b> | -2.58 |       |  |  |       | -4.21 | -4.64 | -4.18 |
| spr1311 | tRNA (guanosine-2-O-)-methyltransferase          | <b>10</b> | -2.50 |       |  |  |       | -3.32 | -3.34 | -3.14 |
| spr1313 | Hypothetical protein                             | <b>10</b> | -2.17 | -2.30 |  |  |       | -2.41 | -2.42 | -2.66 |
| spr1314 | ABCT, ATP-binding protein - Asp/Glu              | <b>10</b> | -3.72 | -4.54 |  |  | -2.52 | -3.46 | -5.70 | -5.65 |
| spr1315 | ABCT membrane-spanning permease - Asp/Glu        | <b>10</b> | -3.74 | -4.40 |  |  | -2.14 | -3.30 | -5.84 | -5.61 |
| spr1316 | Conserved hypothetical protein                   | <b>10</b> | -3.63 | -4.26 |  |  | -2.53 | -3.72 | -5.51 | -6.24 |
| spr1317 | O6-methylguanine-DNA methyltransferase           | <b>10</b> | -3.45 | -3.60 |  |  | -2.35 | -3.79 | -5.70 | -6.40 |
| spr1318 | Hypothetical protein                             | <b>10</b> | -3.41 | -3.04 |  |  | -2.05 | -4.17 | -5.59 | -6.06 |
| spr1319 | Hypothetical protein                             | <b>10</b> | -4.57 | -3.54 |  |  | -2.25 | -3.05 | -3.67 | -4.45 |
| spr1320 | Conserved hypothetical protein                   | <b>10</b> | -3.44 | -3.19 |  |  | -2.25 | -2.13 | -2.87 | -3.39 |
| spr1321 | Conserved hypothetical protein                   | <b>10</b> | -4.12 | -4.02 |  |  | -2.42 | -3.73 | -6.08 | -6.21 |
| spr1322 | Pyridoxine biosynthesis protein                  | <b>10</b> | -3.97 | -3.63 |  |  | -2.09 | -3.64 | -5.42 | -5.12 |
| spr1324 | Thiamine biosynthesis lipoprotein                | <b>10</b> |       |       |  |  |       | -2.01 | -2.61 | -3.08 |
| spr1325 | Conserved hypothetical protein                   | <b>10</b> |       |       |  |  |       |       | -3.13 | -3.32 |
| spr1329 | Gly-tRNA synthetase alpha chain                  | <b>10</b> |       |       |  |  |       |       |       | -2.05 |
| spr1333 | Peptidoglycan GlcNAc deacetylase                 | <b>10</b> |       |       |  |  |       |       |       | -2.30 |
| spr1334 | Hypothetical protein                             | <b>10</b> |       |       |  |  |       |       | -2.10 | -2.59 |
| spr1336 | DEAD RNA helicase                                | <b>10</b> |       |       |  |  |       |       |       | -2.46 |
| spr1338 | Degenerate transposase                           |           | 2.23  | 2.07  |  |  |       | 2.26  | 2.77  | 2.31  |
| spr1342 | Degenerate transposase                           |           | 2.01  |       |  |  |       | 2.28  | 2.63  | 2.49  |
| spr1353 | ABCT, substrate-binding protein – Gln            | <b>11</b> | -2.37 |       |  |  |       | -2.79 | -2.88 | -2.56 |
| spr1354 | ABCT, ATP-binding protein – Gln                  | <b>11</b> | -2.61 | -2.28 |  |  |       | -3.30 | -3.41 | -3.07 |
| spr1355 | ABCT, membrane-spanning permease – Gln           | <b>11</b> | -2.04 |       |  |  |       | -2.21 | -2.27 |       |
| spr1359 | Proton-translocating ATPase, F1, epsilon subunit | <b>11</b> |       |       |  |  |       |       | -2.62 | -3.62 |
| spr1361 | Proton-translocating ATPase, F1, gamma subunit   | <b>11</b> |       |       |  |  |       |       | -2.32 | -2.24 |
| spr1362 | Proton-translocating ATPase, F1, alpha subunit   | <b>11</b> |       |       |  |  | -2.42 |       | -2.40 | -2.29 |
| spr1363 | Proton-translocating ATPase, F1, delta subunit   | <b>11</b> | -2.74 | -5.44 |  |  |       | -2.04 | -5.11 | -5.81 |
| spr1364 | Proton-translocating ATPase, F0, b subunit       | <b>11</b> | -2.73 | -4.96 |  |  |       | -2.02 | -4.46 | -5.12 |
| spr1365 | Proton-translocating ATPase, F0, a subunit       | <b>11</b> | -2.34 | -3.07 |  |  |       |       | -2.96 | -3.11 |
| spr1366 | Proton-translocating ATPase, F0, c subunit       | <b>11</b> | -2.68 | -2.91 |  |  |       | -2.33 | -3.56 | -3.54 |
| spr1367 | Transposase                                      | <b>11</b> |       |       |  |  |       |       | -2.47 | -2.28 |
| spr1368 | Hypothetical protein                             | <b>11</b> |       |       |  |  |       |       | -2.08 | -2.14 |
| spr1377 | Cystathionine gamma-synthase                     | <b>11</b> |       |       |  |  | -2.77 |       | -3.48 | -3.96 |
| spr1379 | ABCT                                             | <b>11</b> |       |       |  |  |       |       | -2.30 | -2.78 |
| spr1380 | ABCT                                             | <b>11</b> |       |       |  |  |       |       | -2.04 | -3.03 |
| spr1381 | ABCT                                             | <b>11</b> |       |       |  |  |       |       | -2.06 | -2.66 |
| spr1382 | ABCT, substrate-binding protein – oligopeptide   | <b>11</b> |       |       |  |  |       |       | -3.77 | -4.63 |
| spr1383 | Polysaccharide transporter                       | <b>11</b> |       |       |  |  |       |       |       | -2.07 |
| spr1384 | UDP-N-acetylmuramoyl-L-Ala-D-Glu-L-Lys           | <b>11</b> | -3.05 | -2.89 |  |  |       | -2.82 | -4.97 | -4.90 |

|         |                                               |    |       |       |       |       |       |       |
|---------|-----------------------------------------------|----|-------|-------|-------|-------|-------|-------|
|         | ligase                                        |    |       |       |       |       |       |       |
| spr1387 | Hypothetical protein                          | 11 |       |       |       |       | -2.18 | -2.18 |
| spr1388 | Hypothetical protein                          | 11 |       |       |       |       | -2.19 | -2.11 |
| spr1397 | Asn-tRNA synthetase                           | 11 | -2.40 | -2.94 |       | -2.13 | -3.50 | -3.29 |
| spr1398 | Conserved hypothetical protein                | 11 | -2.20 | -2.02 |       | -2.65 | -3.30 | -3.02 |
| spr1399 | Asp aminotransferase                          | 11 | -2.45 | -2.38 |       | -2.74 | -3.57 | -2.67 |
| spr1400 | Conserved hypothetical protein                | 11 | -3.98 | -3.28 |       | -4.86 | -4.96 | -4.45 |
| spr1402 | Hypothetical protein                          | 11 |       |       |       |       | -3.07 | -3.44 |
| spr1403 | Hypothetical protein                          | 11 |       | -2.06 |       |       |       |       |
| spr1405 | Conserved hypothetical protein                | 11 |       |       |       |       | -2.13 | -2.44 |
| spr1407 | Hypothetical protein                          | 11 | -2.11 | -2.30 |       |       | -3.03 | -3.16 |
| spr1408 | Formylmethionine deformylase                  | 11 |       |       |       |       | -3.33 | -2.47 |
| spr1411 | Conserved hypothetical protein                | 11 | -2.42 | -2.31 |       | -2.53 | -3.62 | -3.04 |
| spr1436 | Conserved hypothetical protein                |    |       |       |       | 2.17  | 2.94  | 3.16  |
| spr1437 | ABCT, ATP-binding protein - multiple sugar    |    |       |       |       | 2.02  | 3.24  | 3.85  |
| spr1441 | Major facilitator:oxalate/formate antiporter  |    | 4.70  | 2.45  | 3.63  | 5.46  | 3.64  | 4.55  |
| spr1442 | Oxidoreductase (Mercury (II) reductase)       |    |       |       | 2.05  |       |       |       |
| spr1470 | Hypothetical protein                          | 12 | -3.10 |       |       | -2.92 | -2.91 | -2.23 |
| spr1471 | Hypothetical protein                          | 12 | -3.12 |       |       | -2.80 | -2.66 |       |
| spr1472 | Thr-tRNA synthetase                           | 12 | -2.61 |       |       | -2.49 | -3.13 |       |
| spr1485 | Hypothetical protein                          | 12 | -2.67 | -2.50 |       | -2.14 | -2.30 |       |
| spr1486 | Conserved hypothetical protein                | 12 | -2.74 | -3.15 |       |       |       | -2.13 |
| spr1487 | GTP pyrophosphokinase                         | 12 | -4.27 | -4.62 |       | -2.05 | -2.72 | -2.79 |
| spr1490 | Conserved hypothetical protein                | 12 | -4.37 | -3.42 |       | -4.49 | -4.09 | -3.46 |
| spr1491 | Endopeptidase O                               | 12 | -3.15 | -4.77 | -2.15 |       | -3.79 | -3.47 |
| spr1492 | ABCT, ATP-binding protein – Mn                | 12 | -4.98 | -7.40 | -2.86 | -3.48 | -8.75 | -9.34 |
| spr1493 | ABCT, membrane-spanning permease – Mn         | 12 | -2.26 | -3.63 |       |       | -3.60 | -2.94 |
| spr1494 | ABCT, substrate-binding protein – Mn          | 12 | -2.77 | -6.04 | -2.75 |       | -5.03 | -5.45 |
| spr1495 | Thioredoxin-linked thiol peroxidase           | 12 |       | -2.30 |       | -2.02 | -4.05 | -3.73 |
| spr1496 | Hypothetical protein                          | 12 | -2.53 | -3.55 | -2.51 | -2.38 | -4.44 | -3.90 |
| spr1497 | ABCT, ATP-binding protein - unknown substrate | 12 | -2.81 | -3.77 | -2.37 | -2.61 | -4.33 | -3.64 |
| spr1498 | Conserved hypothetical protein                | 12 | -2.75 | -2.87 |       | -2.49 | -3.24 | -2.61 |
| spr1502 | Ile-tRNA synthetase                           | 13 | 2.04  |       |       |       |       |       |
| spr1513 | Mutator protein                               | 13 | 2.02  | 2.33  |       |       |       |       |
| spr1515 | D-Ala-D-Ala ligase                            | 13 |       | 2.21  |       |       |       |       |
| spr1516 | Recombination protein RecR                    | 13 | 2.20  |       |       |       |       |       |
| spr1519 | Glucokinase                                   | 13 |       | 2.11  |       |       |       |       |
| spr1520 | N-acetylneuraminatase lyase subunit           | 13 |       | 2.22  |       |       |       |       |
| spr1522 | Hypothetical protein                          | 13 |       | 2.44  |       | 2.16  |       | 3.13  |
| spr1523 | Hypothetical protein                          | 13 | 2.04  | 2.38  |       | 2.32  | 2.25  | 3.16  |
| spr1524 | Conserved hypothetical protein                | 13 | 2.24  | 2.32  |       | 2.25  | 2.20  | 3.14  |
| spr1525 | ABCT, membrane-spanning permease – sugar      | 13 |       | 2.04  |       |       |       | 2.05  |
| spr1526 | ABCT, membrane-spanning permease – sugar      | 13 |       | 2.07  |       |       |       | 2.49  |
| spr1527 | ABCT, substrate-binding protein – sugar       | 13 |       | 2.19  |       |       |       | 2.66  |
| spr1528 | PTS, sugar-specific EII component             | 13 |       | 2.19  |       | 2.00  | 2.44  | 2.99  |
| spr1529 | N-acetylmannosamine-6-P epimerase             | 13 |       |       |       |       |       | 2.73  |
| spr1530 | Conserved hypothetical protein                | 13 | 2.27  | 2.60  |       | 2.32  | 2.68  | 3.71  |
| spr1531 | Sialidase B precursor (neuraminidase B)       | 13 |       | 2.11  |       |       | 2.20  | 2.65  |
| spr1532 | ABCT, membrane-spanning permease – sugar      | 13 |       | 2.12  |       |       | 2.16  | 2.81  |
| spr1533 | ABCT, membrane-spanning permease – sugar      | 13 |       | 2.15  |       |       | 2.01  | 2.44  |
| spr1536 | Sialidase A precursor (neuraminidase A)       | 13 | 2.11  | 2.19  |       | 2.55  | 2.07  | 2.02  |
| spr1547 | Hypothetical protein                          | 13 | 2.36  | 2.41  |       | 3.31  | 3.93  | 3.49  |
| spr1548 | Hypothetical protein                          | 13 | 2.33  | 2.68  |       | 3.03  | 3.46  | 3.44  |
| spr1549 | Hypothetical protein                          | 13 | 2.14  | 2.39  |       | 2.53  | 3.57  | 2.78  |
| spr1550 | Conserved hypothetical protein                | 13 | 2.09  | 2.40  |       | 2.46  | 2.89  |       |
| spr1551 | Hypothetical protein                          | 13 | 2.16  | 2.14  |       |       |       |       |
| spr1552 | Hypothetical protein                          | 13 | 2.04  |       |       |       |       |       |
| spr1557 | Conserved hypothetical protein                | 13 |       |       |       | 2.65  | 2.64  | 2.49  |
| spr1563 | Degenerate transposase                        | 13 |       | 2.00  |       |       | 3.04  | 3.50  |
| spr1564 | Hypothetical protein                          | 13 |       |       |       |       |       | 2.30  |
| spr1565 | Fructokinase                                  | 13 |       |       |       |       | 2.38  | 2.08  |
| spr1566 | PTS, enzyme II                                | 13 |       |       |       |       | 2.66  | 2.51  |
| spr1568 | Sucrose-6-P hydrolase                         | 13 |       |       |       | 2.24  | 2.66  | 2.38  |
| spr1569 | Sucrose regulon regulatory protein            | 13 |       |       |       |       | 2.12  |       |



|         |                                                  |           |       |       |       |       |       |       |
|---------|--------------------------------------------------|-----------|-------|-------|-------|-------|-------|-------|
| spr1570 | 3-hydroxy-3-methylglutaryl-coenzyme a reductase  | <b>13</b> |       |       |       | 2.01  | 2.16  | 2.06  |
| spr1601 | Hypothetical protein                             |           |       |       |       |       | 2.42  |       |
| spr1602 | Thioredoxin reductase                            |           |       | 2.51  |       |       | 2.62  | 2.36  |
| spr1603 | Conserved hypothetical protein                   |           | 2.07  | 3.16  |       |       | 3.19  | 4.58  |
| spr1604 | Aquaporin Z - water channel protein              |           |       |       |       |       | 2.38  | 2.27  |
| spr1605 | Hypothetical protein                             |           |       |       |       |       | 2.33  | 2.40  |
| spr1611 | Hypothetical protein                             |           |       |       |       |       | 2.19  | 2.48  |
| spr1616 | Chromosome segregation helicase                  |           |       |       |       | 2.03  |       |       |
| spr1617 | Sucrose-6-P hydrolase                            |           |       | 2.74  |       |       | 2.27  | 2.79  |
| spr1618 | ABCT, membrane-spanning permease – sugar         |           |       |       |       |       | 2.10  | 2.54  |
| spr1619 | ABCT, membrane-spanning permease – sugar         |           |       |       |       |       |       | 2.29  |
| spr1627 | Conserved hypothetical protein                   |           |       | 2.32  |       | 2.13  | 3.30  | 3.46  |
| spr1632 | Trp synthetase beta chain                        |           |       |       |       |       | -2.22 | -2.98 |
| spr1633 | P-ribosylanthranilate isomerase.                 |           |       |       |       |       | -2.19 | -2.55 |
| spr1634 | Indole-3-glycerol-P synthase.                    |           |       |       |       | -2.17 | -2.46 | -2.76 |
| spr1635 | Anthranilate P-ribosyltransferase                |           |       |       |       | -2.13 | -2.12 | -2.73 |
| spr1636 | Anthranilate synthase component II               |           |       |       |       | -2.20 | -2.28 | -2.66 |
| spr1637 | Anthranilate synthase component I                |           |       |       |       | -2.32 | -2.06 | -2.49 |
| spr1652 | Hypothetical protein                             | <b>14</b> | -2.16 | -2.32 |       |       |       |       |
| spr1654 | Conserved hypothetical protein                   | <b>14</b> |       | -2.77 |       |       |       |       |
| spr1655 | Conserved hypothetical protein                   | <b>14</b> |       | -2.64 |       | -2.58 | -2.05 | -2.22 |
| spr1656 | ABCT, ATP-binding/membrane spanning protein      | <b>14</b> |       | -2.18 |       |       |       |       |
| spr1657 | ABCT, ATP-binding/membrane spanning protein      | <b>14</b> |       | -2.06 |       |       |       |       |
| spr1658 | Conserved hypothetical protein                   | <b>14</b> |       | -2.56 |       |       |       |       |
| spr1659 | Hypothetical protein                             | <b>14</b> | -2.42 | -3.24 |       |       |       |       |
| spr1661 | Hypothetical protein                             | <b>14</b> |       |       |       | 2.33  |       |       |
| spr1662 | Xanthine P-ribosyltransferase                    | <b>14</b> |       |       |       | 2.02  |       |       |
| spr1668 | Galactokinase                                    | <b>14</b> |       |       |       | -2.47 |       |       |
| spr1669 | GalR, regulator of gal operon                    | <b>14</b> | -3.37 | -3.87 | -3.27 | -3.84 | -3.82 | -4.47 |
| spr1670 | Alcohol DH                                       | <b>14</b> | -2.87 | -3.78 | -3.93 | -2.84 | -2.88 | -2.45 |
| spr1671 | Conserved hypothetical protein                   | <b>14</b> | -2.76 | -3.85 | -3.52 |       |       |       |
| spr1672 | Cation diffusion facilitator - heavy metal       | <b>14</b> | -2.25 | -3.02 |       |       |       |       |
| spr1674 | Conserved hypothetical protein                   | <b>14</b> | -2.51 | -2.21 |       |       |       |       |
| spr1677 | ABCT, membrane-spanning permease - choline       | <b>14</b> | -2.73 | -2.92 |       |       |       |       |
| spr1678 | ABCT, ATP-binding protein – choline              | <b>14</b> | -3.25 | -3.16 |       |       | -2.18 |       |
| spr1679 | Hypothetical protein                             | <b>14</b> | -3.41 | -3.08 |       | -2.02 | -2.33 |       |
| spr1680 | Hypothetical protein                             | <b>14</b> | -2.96 | -2.56 |       | -2.15 | -2.43 | -2.45 |
| spr1681 | Hypothetical protein                             | <b>14</b> |       | -2.20 |       |       |       |       |
| spr1682 | Glu aminopeptidase                               | <b>14</b> | -2.98 | -3.10 |       |       | -2.41 | -2.94 |
| spr1684 | ABCT, membrane-spanning permease - ferric iron   | <b>14</b> |       |       |       | -2.20 | -2.19 | -2.58 |
| spr1685 | ABCT, membrane-spanning permease - ferric iron   | <b>14</b> |       |       |       | -2.17 | -2.25 | -2.56 |
| spr1686 | ABCT, ATP-binding protein - ferric iron          | <b>14</b> |       |       |       |       |       | -2.00 |
| spr1687 | ABCT, substrate-binding protein - ferric iron    | <b>14</b> |       |       |       |       | -2.50 | -2.15 |
| spr1694 | Conserved hypothetical protein                   | <b>14</b> | -2.10 | -2.25 |       |       |       |       |
| spr1695 | Hypothetical protein                             | <b>14</b> | -2.05 | -2.01 |       |       |       |       |
| spr1696 | Glutamate racemase                               | <b>14</b> | -2.10 |       |       |       |       |       |
| spr1697 | Hypothetical protein                             | <b>14</b> | -2.25 |       | -2.23 |       |       |       |
| spr1698 | Dextran glucosidase                              | <b>14</b> | -2.82 | -3.35 |       |       |       |       |
| spr1708 | Hypothetical protein                             |           | -2.36 | -3.01 | -2.20 |       | -2.05 | -2.24 |
| spr1709 | Dextran sucrose (sucrose 6-glucosyltransferase)  |           |       | -3.20 |       |       | -2.07 |       |
| spr1710 | ABCT, membrane spanning permease - sugars        |           |       | -2.18 |       |       |       |       |
| spr1718 | Conserved hypothetical protein                   |           |       |       |       |       |       | 2.48  |
| spr1721 | Degenerate transposase (fusion of orf1 and orf2) |           |       |       |       |       | 2.33  | 3.15  |
| spr1734 | ABCT, ATP-binding protein                        |           |       |       |       |       |       | 2.01  |
| spr1735 | ABCT, ATP-binding protein                        |           |       |       |       |       | 2.01  | 2.76  |
| spr1736 | ABCT, ATP-binding protein                        |           |       |       |       |       |       | 2.25  |
| spr1749 | Hypothetical protein                             |           |       |       |       |       | 2.15  | 2.20  |
| spr1750 | Hypothetical protein                             |           |       |       |       |       | 2.35  | 2.00  |
| spr1751 | Hypothetical protein                             |           |       |       |       |       | 2.02  | 2.30  |
| spr1752 | Hypothetical protein                             |           |       |       |       |       | 2.21  |       |
| spr1761 | Conserved hypothetical protein                   |           |       |       |       | 2.07  |       |       |
| spr1762 | Hypothetical protein                             |           |       | 2.57  |       |       | 2.28  | 2.78  |
| spr1763 | Transcriptional activator                        |           |       |       |       |       | 2.97  | 3.43  |
| spr1765 | Hypothetical protein                             |           |       |       |       | 2.25  | 3.03  | 3.60  |

|         |                                                 |           |       |       |      |       |       |
|---------|-------------------------------------------------|-----------|-------|-------|------|-------|-------|
| spr1766 | Hypothetical protein                            |           |       | 2.03  | 2.85 | 3.80  | 4.62  |
| spr1767 | CyIM protein, cytolytic toxin system            | 2.08      |       | 2.02  | 2.64 | 3.32  | 3.92  |
| spr1768 | Conserved hypothetical protein                  |           |       |       | 2.50 | 3.25  | 3.37  |
| spr1770 | ABCT, ATP-binding/membrane-spanning – hemolysin |           |       |       | 2.23 | 2.55  | 2.63  |
| spr1771 | Subtilisin-like serine protease                 | 2.03      |       |       | 2.60 | 2.91  | 3.07  |
| spr1772 | Hypothetical protein                            |           |       |       | 2.09 |       | 2.43  |
| spr1773 | ABCT, ATP-binding protein                       |           |       |       |      |       | 2.06  |
| spr1775 | Nucleoside di-P kinase                          | 2.34      | 2.66  |       |      |       |       |
| spr1808 | Potential aminotransferase                      |           |       |       |      | -2.02 | -2.30 |
| spr1815 | Histidine kinase                                | 2.00      |       |       | 2.25 |       | 2.14  |
| spr1816 | Conserved hypothetical protein                  |           |       |       | 2.93 | 2.62  | 2.93  |
| spr1817 | ABCT, ATP binding protein                       | 2.09      | 2.08  |       | 2.95 | 2.65  | 2.90  |
| spr1818 | Hypothetical protein                            | 2.41      | 2.64  |       | 3.24 | 3.47  | 3.33  |
| spr1820 | Transcription antitermination factor            | 2.43      | 2.31  |       |      |       |       |
| spr1821 | Preprotein translocase secE component           | 2.30      | 2.35  |       | 2.15 | 2.10  |       |
| spr1822 | 50S Ribosomal protein L33                       |           |       |       | 2.00 |       |       |
| spr1826 | Conserved hypothetical protein                  |           |       |       | 2.37 |       | 2.21  |
| spr1832 | Conserved hypothetical protein                  |           |       | -2.04 |      |       |       |
| spr1833 | Beta-glucosidase                                |           |       | -2.21 |      | -2.68 | -2.43 |
| spr1834 | PTS, cellobiose-specific IIC component          |           |       | -2.05 |      | -2.29 | -2.12 |
| spr1836 | PTS, cellobiose-specific IIA component          |           |       | -3.23 |      |       |       |
| spr1837 | Alcohol-acetaldehyde DH                         |           |       |       |      | -2.97 | -2.55 |
| spr1867 | N-acetylglucosamine-6-P deacetylase             |           |       |       |      | -2.51 | -3.10 |
| spr1878 | Threonine synthase                              | <b>15</b> |       |       | 2.19 | 2.47  | 2.30  |
| spr1879 | Hypothetical protein                            | <b>15</b> |       |       | 2.18 | 2.64  | 2.41  |
| spr1880 | Conserved hypothetical protein                  | <b>15</b> | 2.31  | 2.43  | 2.52 | 3.49  | 3.21  |
| spr1881 | Glu-tRNA synthetase                             | <b>15</b> |       |       |      | 2.15  | 2.20  |
| spr1882 | Glucose-6-P isomerase                           | <b>15</b> |       |       |      |       | 2.15  |
| spr1883 | Hypothetical protein                            | <b>15</b> | 2.94  | 3.46  | 3.29 | 3.06  | 6.26  |
| spr1884 | Glutamine amidotransferase                      | <b>15</b> | 4.13  | 5.76  |      | 5.73  | 9.69  |
| spr1885 | ABCT, ATP-binding/membrane spanning protein     | <b>15</b> |       | 2.10  | 2.47 | 3.06  | 3.13  |
| spr1887 | ABCT, ATP-binding/membrane spanning protein     | <b>15</b> |       |       |      | 2.15  | 2.16  |
| spr1891 | Tranposase (orf2)                               | <b>15</b> |       |       |      | 2.16  | 2.06  |
| spr1895 | ABCT, substrate-binding protein – phosphate     | <b>15</b> | 2.48  | 2.54  |      | 3.61  | 7.82  |
| spr1896 | ABCT, membrane-spanning permease – phosphate    | <b>15</b> | 2.47  | 2.45  |      | 3.34  | 8.11  |
| spr1897 | ABCT, membrane-spanning permease – phosphate    | <b>15</b> | 2.37  | 2.28  |      | 3.18  | 6.40  |
| spr1898 | ABCT, ATP-binding protein – phosphate           | <b>15</b> | 2.32  | 2.31  |      | 2.92  | 6.27  |
| spr1899 | Negative regulator of pho regulon for phosphate | <b>15</b> | 2.20  | 2.34  |      | 2.85  | 5.87  |
| spr1900 | Transposase, IS1380-Spn1 related                | <b>15</b> |       |       |      | 2.21  | 4.41  |
| spr1901 | Hypothetical protein                            | <b>15</b> |       |       |      | 2.22  | 4.28  |
| spr1902 | Glycerol-3-P DH                                 | <b>15</b> |       |       |      |       | 2.21  |
| spr1908 | Conserved hypothetical protein                  | <b>15</b> |       |       |      | 2.73  | 3.40  |
| spr1909 | Penicillin-binding protein 1b                   | <b>15</b> |       |       |      | 2.11  | 2.75  |
| spr1910 | Tyrosyl-tRNA synthetase 1                       | <b>15</b> | 2.00  |       |      | 2.25  | 2.48  |
| spr1916 | Maltodextrin phosphorylase                      | <b>15</b> |       |       |      | 2.80  | 2.38  |
| spr1918 | ABCT, substrate-binding protein – maltose       | <b>15</b> |       |       |      |       | 2.49  |
| spr1919 | ABCT, membrane-spanning permease – maltose      | <b>15</b> |       |       |      |       | 2.55  |
| spr1920 | ABCT, membrane-spanning permease – maltose      | <b>15</b> |       |       |      |       | 2.17  |
| spr1925 | Hypothetical protein                            | <b>15</b> |       |       |      |       | 2.97  |
| spr1926 | Hypothetical protein                            | <b>15</b> |       |       |      | 2.03  | 3.21  |
| spr1927 | Hypothetical protein                            | <b>15</b> |       |       |      |       | 3.15  |
| spr1928 | Hypothetical protein                            | <b>15</b> |       |       |      |       | 2.97  |
| spr1929 | Conserved hypothetical protein                  | <b>15</b> |       |       |      |       | 3.07  |
| spr1941 | Hypothetical protein                            |           |       |       | 2.11 |       |       |
| spr1947 | Tranposase (orf2)                               |           |       |       |      |       | 2.14  |
| spr1948 | Hypothetical protein                            |           |       |       |      |       | 2.48  |
| spr1952 | Conserved hypothetical protein                  |           |       |       |      |       | 3.09  |
| spr1955 | Arg deiminase                                   |           |       |       |      |       | 2.44  |
| spr1956 | Arg deiminase                                   |           |       |       |      |       | 2.18  |
| spr1959 | Conserved hypothetical protein                  |           |       |       |      |       | 2.14  |
| spr1960 | Conserved hypothetical protein                  |           |       |       |      | 2.94  | 3.04  |
| spr1975 | ABCT, substrate-binding protein –Zinc           | -2.11     | -2.71 |       |      |       |       |
| spr1976 | ABCT, membrane-spanning permease – Zinc         | -2.18     | -2.67 |       |      |       | -2.15 |

|         |                                                          |   |       |       |       |       |       |       |
|---------|----------------------------------------------------------|---|-------|-------|-------|-------|-------|-------|
| spr1977 | ABCT, ATP-binding domain - Zinc permease                 |   | -2.29 | -2.66 |       | -2.14 | -2.22 |       |
| spr1978 | Transcriptional repressor for Zinc-responsive expression |   | -2.20 | -2.47 |       |       |       |       |
| spr1979 | D-Ala transfer from undecaprenol-P to poly (glycero-P)   |   |       | -2.95 |       |       | -2.36 | -2.61 |
| spr1980 | D-Ala carrier protein                                    |   |       | -2.36 |       |       |       |       |
| spr1981 | D-Ala transfer from Dcp to undecaprenol-P                |   |       | -2.78 |       |       |       |       |
| spr1982 | D-Ala-D-Ala carrier protein ligase                       |   | -2.05 | -2.81 |       |       |       |       |
| spr1984 | Transposase                                              |   |       | -2.07 |       |       |       |       |
| spr1985 | Transposase                                              |   |       |       |       |       | 3.26  | 2.94  |
| spr2003 | Conserved hypothetical protein                           |   |       |       |       |       |       | 2.02  |
| spr2004 | ABCT, membrane-spanning permease                         |   |       |       | 2.76  |       |       |       |
| spr2005 | Conserved hypothetical protein                           |   |       |       |       |       | 2.26  |       |
| spr2012 | Involved in transformation                               |   | -2.10 |       |       | -2.28 | -2.07 |       |
| spr2013 | Involved in transformation                               |   | -2.53 |       |       | -3.08 | -2.56 |       |
| spr2018 | Degenerate transposase                                   |   |       |       | -2.30 |       |       |       |
| spr2021 | General stress protein GSP-781                           |   |       |       |       | -3.43 |       |       |
| spr2022 | Cell-shape determining protein MreD                      | 1 | 2.66  | 2.54  |       | 3.01  | 4.93  | 4.42  |
| spr2023 | Cell shape determining protein MreC                      | 1 |       |       |       |       | 2.27  | 2.24  |
| spr2024 | ABCT, membrane-spanning permease                         | 1 |       |       |       |       | 2.14  | 2.07  |
| spr2027 | Phosphatidylglycero-P synthase                           | 1 |       |       |       |       | 2.32  | 2.26  |
| spr2028 | Conserved hypothetical protein                           | 1 | 2.01  |       |       | 2.57  | 3.99  | 3.51  |
| spr2029 | Conserved hypothetical protein                           | 1 |       |       |       | 2.02  | 2.95  | 2.85  |
| spr2030 | Conserved hypothetical protein                           | 1 |       |       |       | 2.13  | 3.59  | 3.47  |
| spr2031 | Conserved hypothetical protein                           | 1 | 2.12  | 2.67  |       |       | 4.24  | 4.01  |
| spr2032 | Recombination protein RecF                               | 1 |       |       |       |       | 2.81  | 2.88  |
| spr2033 | Inosine-5-mono-P DH                                      | 1 |       |       |       |       | 2.09  | 2.23  |
| spr2034 | Trp-tRNA synthetase                                      | 1 |       |       |       |       | 3.08  | 2.69  |
| spr2035 | ABCT, ATP-binding protein                                | 1 |       |       |       |       | 2.85  | 2.58  |
| spr2036 | Conserved hypothetical protein                           | 1 |       |       |       |       | 3.67  | 3.29  |
| spr2037 | Conserved hypothetical protein                           | 1 |       |       |       |       | 2.95  | 2.20  |
| spr2038 | Conserved hypothetical protein                           | 1 |       |       |       |       | 2.87  | 2.17  |
| spr2039 | Conserved hypothetical protein                           | 1 |       |       | 2.56  |       | 2.49  | 2.21  |
| spr2040 | Conserved hypothetical protein                           | 1 | 2.05  | 2.77  |       | 2.46  | 4.59  | 4.08  |
| spr2041 | Response regulator                                       | 1 |       |       |       |       | 2.12  | 2.10  |
| spr2042 | His protein kinase                                       | 1 |       |       |       |       | 2.10  | 2.07  |
| spr2043 | Competence stimulating peptide precursor                 | 1 |       |       |       |       | 3.71  |       |
| spr2044 | Conserved hypothetical protein                           | 1 |       |       |       |       | 2.90  | 2.08  |

<sup>a</sup>ABCT, ATP-binding cassette transporter; DH, dehydrogenase; P, phospho; PTS, phosphotransferase system; AA, amino acid.

<sup>b</sup>Only genes whose transcript level showed significant fold variations with respect to time 0 min ( $\geq 2.0$ -fold and  $p < 0.01$ ) are shown.

**Supplementary Table 2. Validation of microarray data by real-time RT-PCR**

| R6 locus (gene)         | PCR Primers (5'→3') <sup>b</sup>                         | Product (bp) | Time (min) | Relative expression level analysis at <sup>a</sup> : |                |                  |                |
|-------------------------|----------------------------------------------------------|--------------|------------|------------------------------------------------------|----------------|------------------|----------------|
|                         |                                                          |              |            | 0.5 × MIC                                            |                | 40 × MIC         |                |
|                         |                                                          |              |            | RT-PCR                                               | Array          | RT-PCR           | Array          |
| spr0444 ( <i>glnA</i> ) | GGATCCAATGGCGAACCCCTTAC +<br>CCTTGCGCTCTTCTGCTGTCAT –    | 134          | 5<br>15    | 1,00<br>2,10                                         | 1,09<br>1,08   | -1,40<br>1,49    | 1,17<br>1,24   |
| spr0715 ( <i>gyrB</i> ) | TGAAATAGTTGGAGATACGGA +<br>GAAATTTGAAGACCGCGATTT –       | 149          | 5<br>15    | 1,83<br>2,44                                         | 1,58<br>1,44   | 1,84<br>2,95     | 1,79<br>1,93   |
| spr0756 ( <i>parE</i> ) | AAGCGAACAGATGAAGCGATTGAG +<br>TCCTTGGTGCGAACGTTATTGACA – | 205          | 5<br>15    | -2,86<br>-1,56                                       | -1,46<br>-1,25 | -4,76<br>-11,11  | -1,26<br>-2,89 |
| spr1099 ( <i>gyrA</i> ) | TGATAAACGCCGTACAGAGTT +<br>CCACGACCCCCACGTTTTTGTGAGC –   | 158          | 5<br>15    | -1,22<br>1,56                                        | 1,23<br>1,22   | -1,47<br>1,12    | 1,28<br>1,34   |
| spr1122 ( <i>zwf</i> )  | CGGAGCGCTTGGGTGTAGAA +<br>CATGGCGAGGAGCGAAAGAA –         | 107          | 5<br>15    | 1,14<br>2,52                                         | 1,63<br>2,00   | -1,75<br>-1,02   | 1,61<br>1,62   |
| spr1141 ( <i>topA</i> ) | TCACCAAGGATGCAGTCAAAAATG +<br>GGCGAAATCGAATACCCTACCA –   | 118          | 5<br>15    | -7,86<br>-5,42                                       | -3,91<br>-4,36 | -22,37<br>-20,69 | -4,73<br>-6,28 |
| spr1366 ( <i>atpC</i> ) | GCTTATGTATTGCCTGTA +<br>TTGATAATAAATGAGAAGAC –           | 177          | 5<br>15    | -19,55<br>-14,08                                     | -2,68<br>-2,91 | -20,88<br>-31,80 | -2,33<br>-3,56 |
| spr1538                 | TGTTTCCACGCTTCCATCCT +<br>TGCGTGATAGACCTTTCCTT –         | 113          | 5<br>15    | 1,11<br>1,55                                         | 1,76<br>1,66   | -1,26<br>-1,59   | 1,55<br>1,37   |
| spr1552                 | TGAAAAGGCCAACAGAAATA +<br>CAATAGCTAGCAGAATAAAAAGAA –     | 197          | 5<br>15    | 1,20<br>2,06                                         | 2,04<br>1,87   | 1,07<br>-1,03    | 2,53<br>2,46   |
| spr1625                 | AACTAAAGAACAGCATGAAGCAGA +<br>GAGAAACCAGATCCAAGACCAG –   | 129          | 5<br>15    | -1,84<br>-1,29                                       | 1,02<br>1,05   | -2,65<br>-1,62   | 1,06<br>1,16   |
| spr1680                 | TGCTAGCCCATCATATTCGTTTGT +<br>CAGTTGCGCAGCCAGTTTCA –     | 138          | 5<br>15    | -14,06<br>-8,62                                      | -2,96<br>-2,56 | -16,56<br>-14,19 | -2,15<br>-2,43 |
| spr1794 ( <i>cbfI</i> ) | AAGATGATAGTGGCGAGATTGATG +<br>TTGATTGACTTGAGGGGTATTGTT – | 134          | 5<br>15    | -1,55<br>-1,86                                       | 1,37<br>-1,10  | -1,41<br>-2,40   | 1,83<br>1,15   |
| spr1863 ( <i>cglB</i> ) | ATGCACGTGAATGGGGGAATA +<br>TTGAGCCAGATCTTGACCGACTT –     | 116          | 5<br>15    | -2,81<br>-1,72                                       | 1,01<br>-1,08  | -2,40<br>-2,47   | 1,04<br>1,09   |
| spr2001 ( <i>ctsR</i> ) | GCCTACATCAAGGCGATTTT +<br>TTCCGTAAAGCGTGTCTTGA –         | 123          | 5<br>15    | -3,15<br>-1,47                                       | -1,13<br>1,21  | -5,06<br>-2,27   | -1,19<br>1,28  |

<sup>a</sup> RT-PCR fluorescent values were normalized with those obtained from the amplification of 16 SrDNA and *rpoB*.

<sup>b</sup> +, forward primer, –, reverse primer.
